# Supplementary material for: Algal Turf Sediments and Sediment Production by Parrotfishes across the Continental Shelf of the Northern Great Barrier Reef
Source: PLOS journal article supplement (doi:10.1371/journal.pone.0170854), 2017-01-25
Supplement: S4 (10.1371/journal.pone.0170854.s004) [file journal.pone.0170854.s004]

**S4 Table. Summary of GLMM results used to examine differences in EAM sediment loads.**

The generalised linear mixed effects model was based on a GAMMA distribution with a log link and contained shelf position as a fixed effect and individual reef as a random effect. SE = standard error, df = degrees of freedom.

| <b>Response variable</b> | <b>Model used</b> | <b>Predictor variable</b> | <b>Estimate</b> | <b>SE</b> | <b><i>t</i> value</b> | <b><i>p</i> value</b> |
|--------------------------|-------------------|---------------------------|-----------------|-----------|-----------------------|-----------------------|
| <b>EAM sediment load</b> | Gamma (GLMM)      | Intercept                 | 6.760           | 0.337     | 20.039                | < 0.0001              |
|                          |                   | Mid-shelf                 | -2.063          | 0.432     | -4.774                | < 0.0001              |
|                          |                   | Outer-shelf               | -1.133          | 0.452     | -2.507                | < 0.05                |
